# Supplementary material for: Associations between Milk Intake and Sleep Disorders in Chinese Adults: A Cross-Sectional Study
Source: MDPI journal article supplement (doi:10.3390/nu15184079), 2023-09-21
Supplement: s1 [file s1]

Supplementary tables and figures

Supplementary Table S1: Correlation analysis between baseline characteristics

|                     | Milk intake | Sleep Quailty | Sleep Efficiency | Sleep Latency | Sleep Duration | Sleep Disturbances | Daytime Dysfunction | Sleep Medication | Sleep Disorders | PSQI Global Scores |
|---------------------|-------------|---------------|------------------|---------------|----------------|--------------------|---------------------|------------------|-----------------|--------------------|
| Milk intake         | 1.000       |               |                  |               |                |                    |                     |                  |                 |                    |
| Sleep Quailty       | -0.042      | 1.000         |                  |               |                |                    |                     |                  |                 |                    |
| Sleep Efficiency    | 0.016       | 0.300 ***     | 1.000            |               |                |                    |                     |                  |                 |                    |
| Sleep Latency       | -0.053      | 0.535 ***     | 0.250 ***        | 1.000         |                |                    |                     |                  |                 |                    |
| Sleep Duration      | 0.045       | 0.266 ***     | 0.502 ***        | 0.238 ***     | 1.000          |                    |                     |                  |                 |                    |
| Sleep Disturbances  | -0.137 ***  | 0.158 ***     | 0.155 ***        | 0.170 ***     | 0.004          | 1.000              |                     |                  |                 |                    |
| Daytime Dysfunction | -0.057      | 0.202 ***     | 0.203 ***        | 0.145 ***     | 0.133 ***      | 0.315 ***          | 1.000               |                  |                 |                    |
| Sleep Medication    | 0.013       | 0.290 ***     | 0.113 **         | 0.208 ***     | 0.100 **       | 0.060              | 0.086 *             | 1.000            |                 |                    |
| Sleep Disorders     | -0.073 *    | 0.365 ***     | 0.547 ***        | 0.400 ***     | 0.478 ***      | 0.333 ***          | 0.470 ***           | 0.145 ***        | 1.000           |                    |
| PSQI Global Scores  | -0.066      | 0.599 ***     | 0.674 ***        | 0.603 ***     | 0.580 ***      | 0.399 ***          | 0.480 ***           | 0.261 ***        | 0.828 ***       | 1.000              |

Note: All data were reported as Spearman correlations. \*p < 0.05, \*\*p < 0.01, \*\*\*p < 0.001.

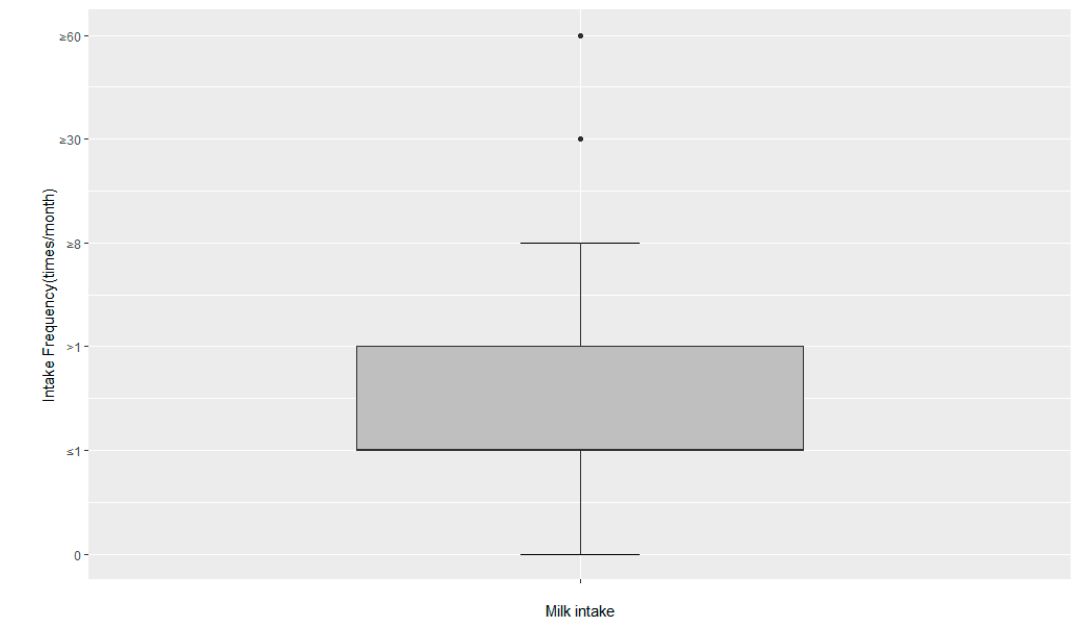

Supplementary Figure S1: Distribution of milk intake frequencies

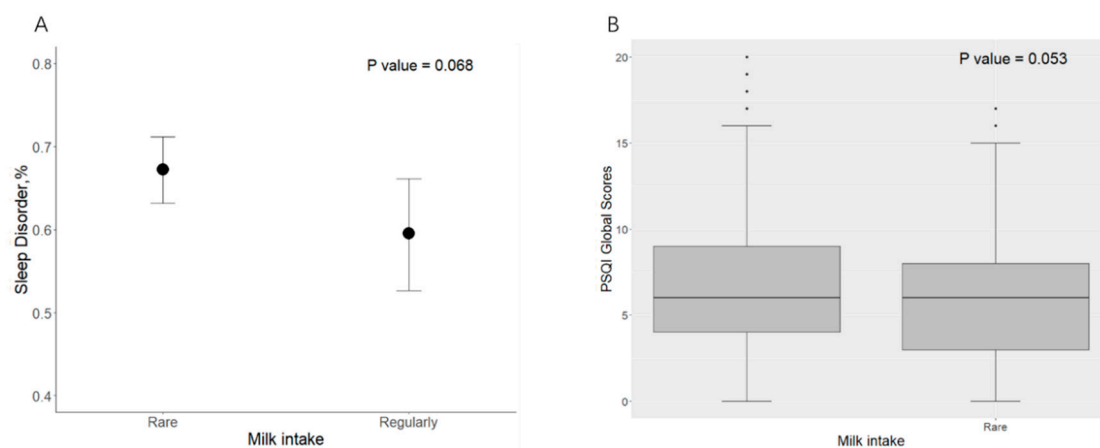

Supplementary Figure S2: The prevalence of sleep disorders in different groups of milk intake.

Note: (A) The percentage of sleep disorders and 95% CI between Rare and Regularly.

(B) A third of the frequency of PSQI Global Score is between Rare and Regularly.

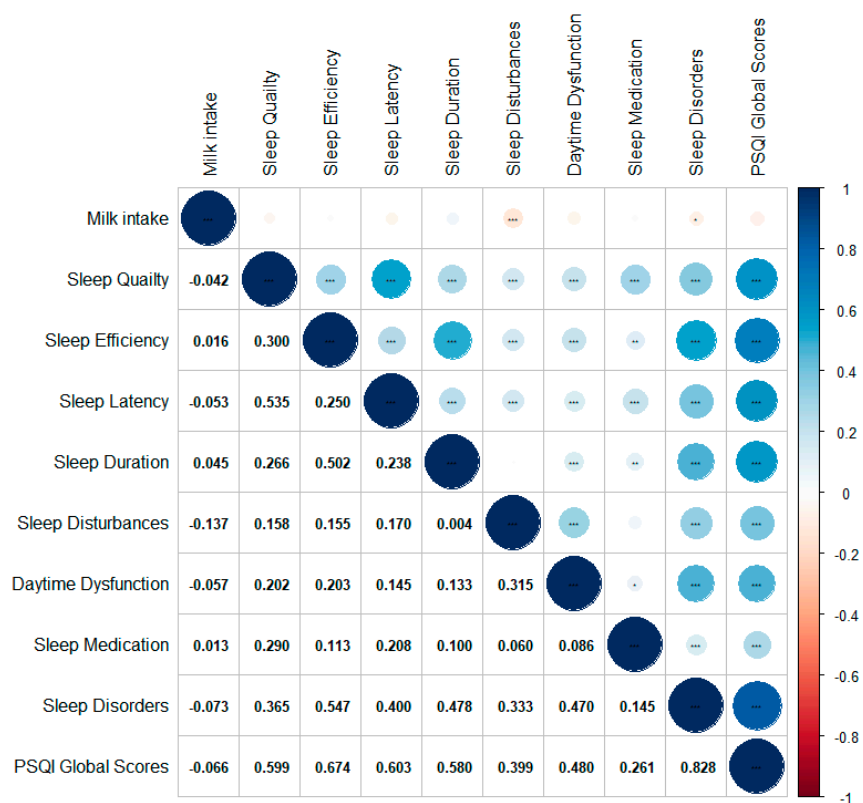

Supplementary Figure S3: Correlation analysis between baseline characteristics

Note: All data were reported as Spearman correlation analyses. \* $p < 0.05$ , \*\* $p < 0.01$ , \*\*\* $p < 0.001$ .

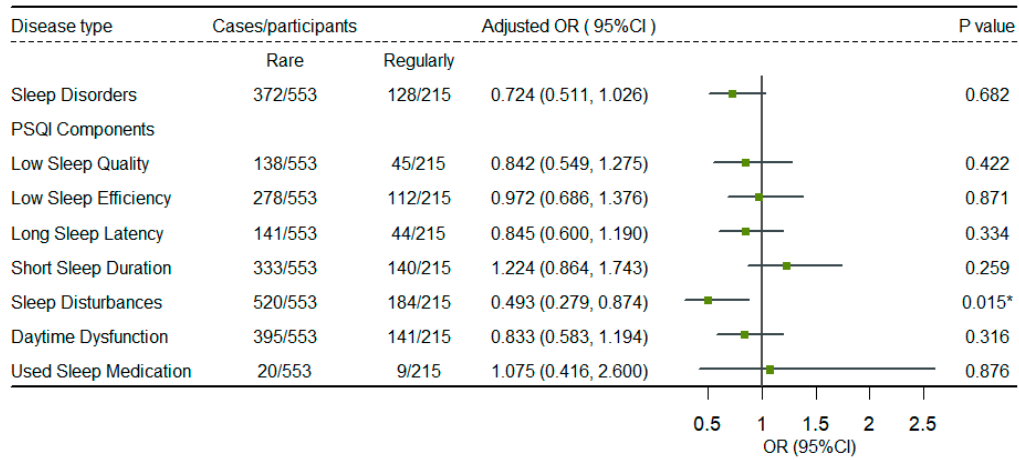

Supplementary Figure S4: Odds ratios of sleep disorders or PSQI components and corresponding 95% CIs according to tertiles of milk intake. Note: logistic regression models adjusted for age, gender, BMI, smoking, alcohol consumption, dietary confounders (salt, fruit intake, vegetable intake, seafood intake, red meat intake, egg intake, soy product intake, nuts intake, sugar-sweetened beverages intake) and clinical factors (hyper-tension, diabetes, coronary heart disease, anxiety, and depression). \* $p < 0.05$ .
